# Supplementary material for: Interleukin-6 Induces Vascular Endothelial Growth Factor-C Expression via Src-FAK-STAT3 Signaling in Lymphatic Endothelial Cells
Source: PubMed Central journal article supplement (PMC4934912; doi:10.1371/journal.pone.0158839), 2016-07-06
Supplement: pone.0158839.s001.pdf [file pone.0158839.s001.pdf]

S1 Fig

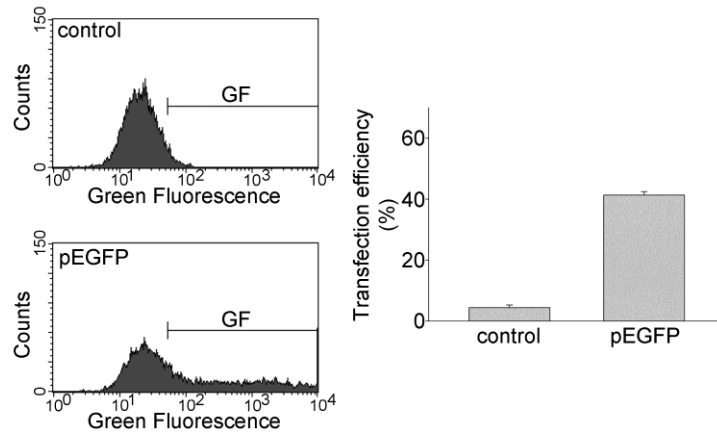

### S1 Fig. Transfection efficiency in SV-LECs

SV-LECs were transfected with control vector (pcDNA) or a green fluorescence protein expression vector pEGFP as described in the “Materials and methods” section. After transfection, cells were harvested and resuspended in PBS. Green fluorescence derived from successful transfected cells were determined by flow-cytometric analysis with FACSscan and Cellquest program (Becton Dickinson). Transfection efficiency is defined as the percentage of cells expressing green fluorescence (GF). The compiled results show a transfection rate is approximately 40 % (N=3).
